# Supplementary material
Source: Springer Nature journal article supplement (https://www.springermedizin.de/resource/supplementary/12984_2012_442_MOESM2_ESM.pdf/9604748)

**A**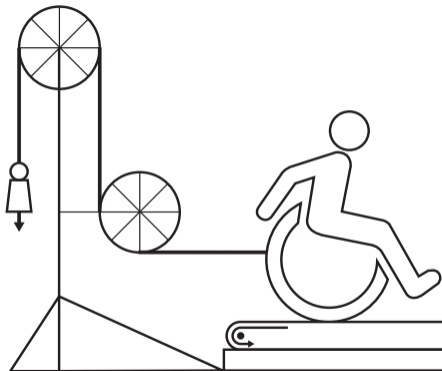**B**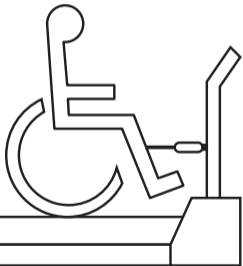

Supplement: MOESM2 [file 9604748]
